# Supplementary material for: Hydration effect and molecular geometry conformation as critical factors affecting the longevity stability of G 4 -structure-based supramolecular hydrogels
Source: Royal Society of Chemistry journal article supplement (doi:10.1039/d4tb01145g), 2024-01-01
Supplement: d4tb01145g1.pdf [file d4tb01145g1.pdf]

**Supporting Information for**  
**Hydration Effect and Molecular Geometry Conformation as the**  
**Critical Factors Affect the Longevity Stability of G<sub>4</sub>-structure-**  
**based Supramolecular Hydrogels**

**Jiang Liu,<sup>a,#</sup> Lideng Cao,<sup>a,#</sup> Zheng Wang,<sup>a</sup> Qianming Chen,<sup>a</sup> Hang Zhao<sup>a</sup>, Xiurong**  
**Guo,<sup>b,\*</sup> Yao Yuan,<sup>a,\*</sup>**

*<sup>a</sup>State Key Laboratory of Oral Diseases & National Center for Stomatology & National Clinical Research Center for Oral Diseases & Research Unit of Oral Carcinogenesis and Management & Chinese Academy of Medical Sciences, West China Hospital of Stomatology, Sichuan University, Chengdu 610041, Sichuan, China*

*<sup>b</sup>School of Pharmacy, Southwest Medical University, Luzhou 646000, Sichuan, China*

<sup>#</sup>These authors contributed equally to this work.

**\*Correspondence:**

Xiurong Guo

Email: [xiurongguo@swmu.edu.cn](mailto:xiurongguo@swmu.edu.cn)

Yao Yuan

Email: [yaoyuan\\_sklo@scu.edu.cn](mailto:yaoyuan_sklo@scu.edu.cn)

## Methods

### General

$\alpha$ -8-aza-2'-deoxyguanosine ( $\alpha\mathbf{G}_d^*$ ) was synthesized following the our previously published work.<sup>1</sup> Other chemicals were commercially available. The solvents and reagents were analytic pure, and all reagent water used in the laboratory was pretreated with the Milli-Q Plus System.

### Crystallographic study

Single crystals were obtained by slowly cooling the corresponding saturated solution in steps of 0.5 °C h<sup>-1</sup> from 100 to 30 °C. Proper-sized single crystals of compounds of  $\mathbf{G}_d$ ,  $\alpha\mathbf{G}_d$  and  $\alpha\mathbf{G}_d^*$  were stabilized into a tiny glass tube including mother liquor with epoxy resin to minimize solvent loss.

### Hydrogels preparation

The powder of  $\mathbf{G}_d$ ,  $\mathbf{G}$ , and  $\alpha\mathbf{G}_d$  was weighed and added to 0.2 M KCl solution and prepared to a concentration of 14 mg/ml, and then heated to 90 °C in a water bath until a clear and transparent solution was obtained. The heated solution was then cooled till the gel is obtained.

### Rheology measurements

The measuring device was equipped with plate-plate geometry (25 mm in diameter, 1.0 mm gap) and a temperature unit (Peltier hood accessory), which offers temperature control. The viscoelastic behavior of hydrogel was analyzed by performing frequency sweep, strain sweep and shear thinning test. All measurements were conducted on hydrogel samples at concentrations of 14 mg/ml at 25 °C. Frequency sweep analysis was performed over an angular frequency ( $\omega$ ) of 0.1~100 rad·s<sup>-1</sup>, under an initial strain ( $\gamma$ ) of 0.1%. Strain-dependent rheology was conducted under  $\gamma$  from 0.1~100% at  $\omega=1$  rad·s<sup>-1</sup>. Shear thinning test was performed under a shear rate from 0.1~100 (1/s).

### Circular Dichroism (CD)

CD spectrometer was performed using Chirascan V100 (Applied Photophysics, UK).  $\mathbf{G}_d$ ,  $\mathbf{G}$ ,  $\alpha\mathbf{G}_d$  and  $\alpha\mathbf{G}_d^*$  in 0.2 M KCl with a concentration of 14 mg/ml. Then the CD

spectra were recorded between 220 and 320 nm, and the path length was 0.1 mm. The CD curve was further smoothed by using the Graphpad Prism 10.0. LD and UV-Vis spectra were measured under the identical conditions.

### **Powder X-ray Diffraction (PXRD)**

X-ray Diffraction (PXRD) experiments were performed using Panalytical-Empyrean (Panalytical, Nederland). PXRD experiments were performed as described previously. Solid powder and hydrogel lyophilized powder were prepared as samples. The experiments were performed under the following conditions: the voltage and anode current used were 40 kV and 40 mA, and the radius was 240.00 mm. The active length was  $3.3482^\circ$ . And the diffractometer position was adopted as following,  $2\theta = 9.9972^\circ$ ,  $\Omega$  offset =  $0.0000^\circ$ ,  $Z = 7.550$  mm, respectively, the  $\text{Cu K}\alpha = 1.540598 \text{ \AA}$  and scanning mode with  $0.01^\circ$  interval and 0.05 s of set time were used to collect the XRD pattern of samples and were recorded from  $2^\circ$  to  $10^\circ$  (SAXRD) or from  $5^\circ$  to  $60^\circ$  (WAXRD) ( $2\theta$ ).

### **Small-angle X-ray Scattering (SAXS) measurement**

SAXS measurement capability was provided on the NanoStar instrument (Bruker, Germany) with Cu target (50Kv/50mA). Montel-P multilayer optics with pinhole collimation system provided the system for high flux/high resolution; Low background collimation system was using new SCATEX two-pinhole setup. The detector type was VANTEC-2000 2D. The softwares used in our study were SAXS for Windows™ XP, DIFFRAC. SAXS and DIFFRAC. EVA. The exposure time was 30 min. The scattering intensity profile was output as the plot of the scattering intensity ( $I$ ) vs the scattering vector,  $q = (4\pi/\lambda) \sin(\theta/2)$  ( $\theta$  = scattering angle). The samples were placed in a Hilgenberg quartz capillary with an outside diameter of 2 mm and a wall thickness of 0.01 mm.

### **Fluorescence measurement**

Fluorescence intensity of ThT containing hydrogels was detected using Cary Eclipse (Agilent, USA). The emission spectra of  $G_4/\text{ThT}$  in the range of 450-600 nm with an excitation wavelength of 450 nm.

### **Differential Scanning Calorimetry (DSC) measurements**

DSC measurements were performed using a Universal V2.5H instrument (TA, America). The compounds were dissolved in 0.2M KCl solution, and heated to 90°C to transparent state, and then cooling down to room temperature to serve as the samples. For every experiment, the samples were first equilibrated to -60 °C and then heated at a rate of 5 °C/min in flowing N<sub>2</sub>.

### **Low Field Nuclear Magnetic Resonance (LF-NMR) measurement**

Transverse spin-spin relaxation ( $T_2$ ) measurement was performed on a MesoMR23-060V-I NMR Analyzer (Niumag Co., Ltd., Shanghai, China) equipped with a 0.5 T permanent magnet, operated at 23.2 MHz for <sup>1</sup>H-resonance frequency and 32 °C. Every sample was placed in a glass NMR tube which was inserted into a 40-mm diameter radio frequency coil to measure  $T_2$  relaxation times. Then  $T_2$  decay was measured by using the Carr-Purcell-Meiboom-Gill (CPMG) sequence with a  $\tau$  value of 100  $\mu$ s (intervals between the 90° and 180° and the 90° and 180° pulses of 13 and 26  $\mu$ s, respectively).

### **Quantitative calculation**

Conformational search was firstly carried out for the four structures (**G**, **G<sub>d</sub>**,  **$\alpha$ G<sub>d</sub>**,  **$\alpha$ G<sub>d</sub>\***) using B3LYP functional with D3(BJ) dispersion correction and 6-31G\* basis set, with SMD solvation model in water solvent. The most stable four isomers were selected to construct the G-quartet blocks. Then the most stable G-quartet blocks were selected to further construct the supramolecular assemblies.

The four supramolecular assemblies' structures were optimized using the semi-empirical PM7 method. The recently developed PM7 semi-empirical method has included dispersion and hydrogen-bond corrections and allows a better description of noncovalent interactions, especially hydrogen-bonding. Moreover, PM7 is considered to be suitable for modeling a wide range of species. The single-point calculations were further improved by using B3LYP functional with D3(BJ) dispersion correction and 6-31G\* basis set, with the SMD model (water as solvent) on the optimized geometries. All calculations were carried out with Gaussian 09.



### **Molecular Dynamics (MD) simulations**

Gromacs 2019.6 package was used to perform all the MD simulation with periodic boundary conditions, applying the Amber14SB all-atom force field combining the TIP3P water model. Long-range electrostatics were calculated using the particle mesh Ewald method with 1.0 nm real space cutoff. For van der Waals interactions, a cutoff value of 1.0 nm was used. All hydrogen related bonds were constrained by the LINCS algorithm. The V-rescale method was used to control the system temperature to 300 K, and Parrinello-Rahman method was used to control the pressure to 1 bar. The three molecules collectively form nine systems (**G**, **G<sub>4</sub>**, **G<sub>4</sub>-10**, **G<sub>d</sub>**, **G<sub>d4</sub>**, **G<sub>d4</sub>-10**, **αG<sub>d</sub>**, **αG<sub>d4</sub>**, **αG<sub>d4</sub>-10**). The nine configurations were energy minimized and subjected to 100 ps NVT equilibration at 300 K. Then, the nine systems were run for 50 ns of NPT production respectively. The time step of simulation was 2 fs. The trajectories were saved every 10 ps, yielding a total of 5,000 snapshots for production analysis.

The crystal structures containing G<sub>4</sub>-structures were downloaded from the PDB database, specifically selecting PDB ID 1XAV. Using the YASARA software, atoms were deleted and replaced to obtain structures containing one layer of G<sub>4</sub>, G<sub>d4</sub>, and αG<sub>d4</sub>. Subsequently, the YASARA software was used to translate and rotate the single-layer structures to obtain structures with 10 layers. The distances and angles for translation and rotation were referenced from the previously literature.<sup>2</sup>

### **Cryo-SEM imaging**

The hydrogels (1.4 wt%) were prepared by the methods above. Helios G4 UC cryogenic dual-beam scanning electron microscope is used. The sample was loaded into the sample holder and quickly plunged into pre-prepared slush nitrogen for about 1 minute for rapid freezing. The frozen fixed liquid sample is then transferred to the sample preparation chamber pre-cooled to -140°C using a Quorum cryogenic transfer device. In a vacuum and low-temperature environment, the sample is randomly fractured. The sample undergoes sublimation for 10 minutes at -70°C, followed by Pt conductive coating treatment for biological samples. The sample is then transferred to the cold stage of the Helios G4 UC cryogenic dual-beam scanning electron microscope's sample

chamber via a cryogenic transfer rod, and observations are made at a temperature of -140°C. Imaging is performed under working conditions of 5 kV voltage and 25 pA beam current.

### **Sustained-release experiment**

Hydrogels were prepared according to the previously described method and methylene blue was added into it while in liquid form. Transfer the mixture into a glass bottle and allow it to naturally cool and set into a hydrogel. Add an equal volume of aqueous solution above the hydrogel as the receptor solution. Sample the receiving solution immediately after preparation, and at 1, 2, 4, and 24 hours. Use an UV-vis spectrophotometer to measure the concentration of methylene blue in the samples. Calculate the release curve based on these measurements.

### **Statistical analysis**

All statistical analysis was performed by using the Graphpad Prism 10.0. Experiments were conducted in triplicates, or otherwise indicated. The data were presented as mean value  $\pm$  SD (standard deviation) without pre-processing. Statistical comparisons between different groups were evaluated with two-way ANOVA test and repeated measures analysis of variance as summing significant at  $P$ -value  $< 0.05$ .

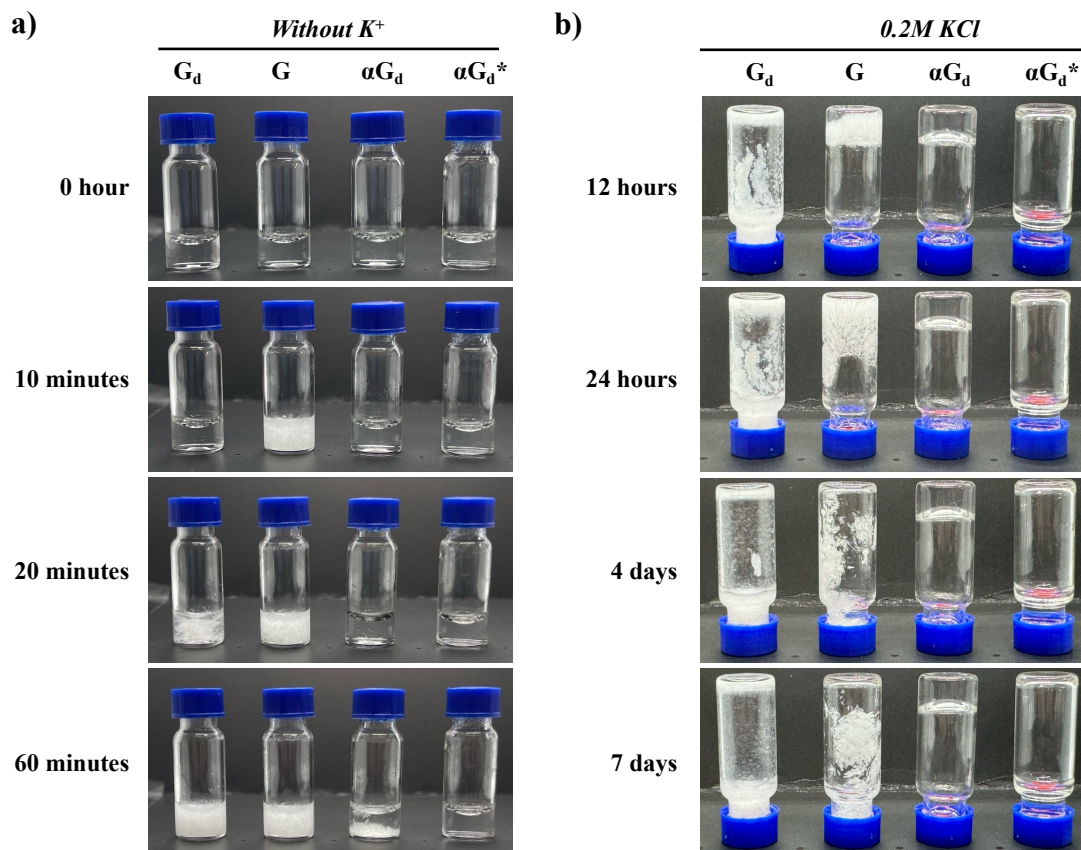

**Figure S1.** Hydrogel formation of guanosine compounds. a) none of guanosine compounds can form hydrogel in the absence of alkaline metal ions, and **G<sub>d</sub>**, **G**, and **αG<sub>d</sub>** gradually underwent precipitation and disintegration in 1 hour; b) **αG<sub>d</sub>** can maintain its transparent gel state for more than 7 days.

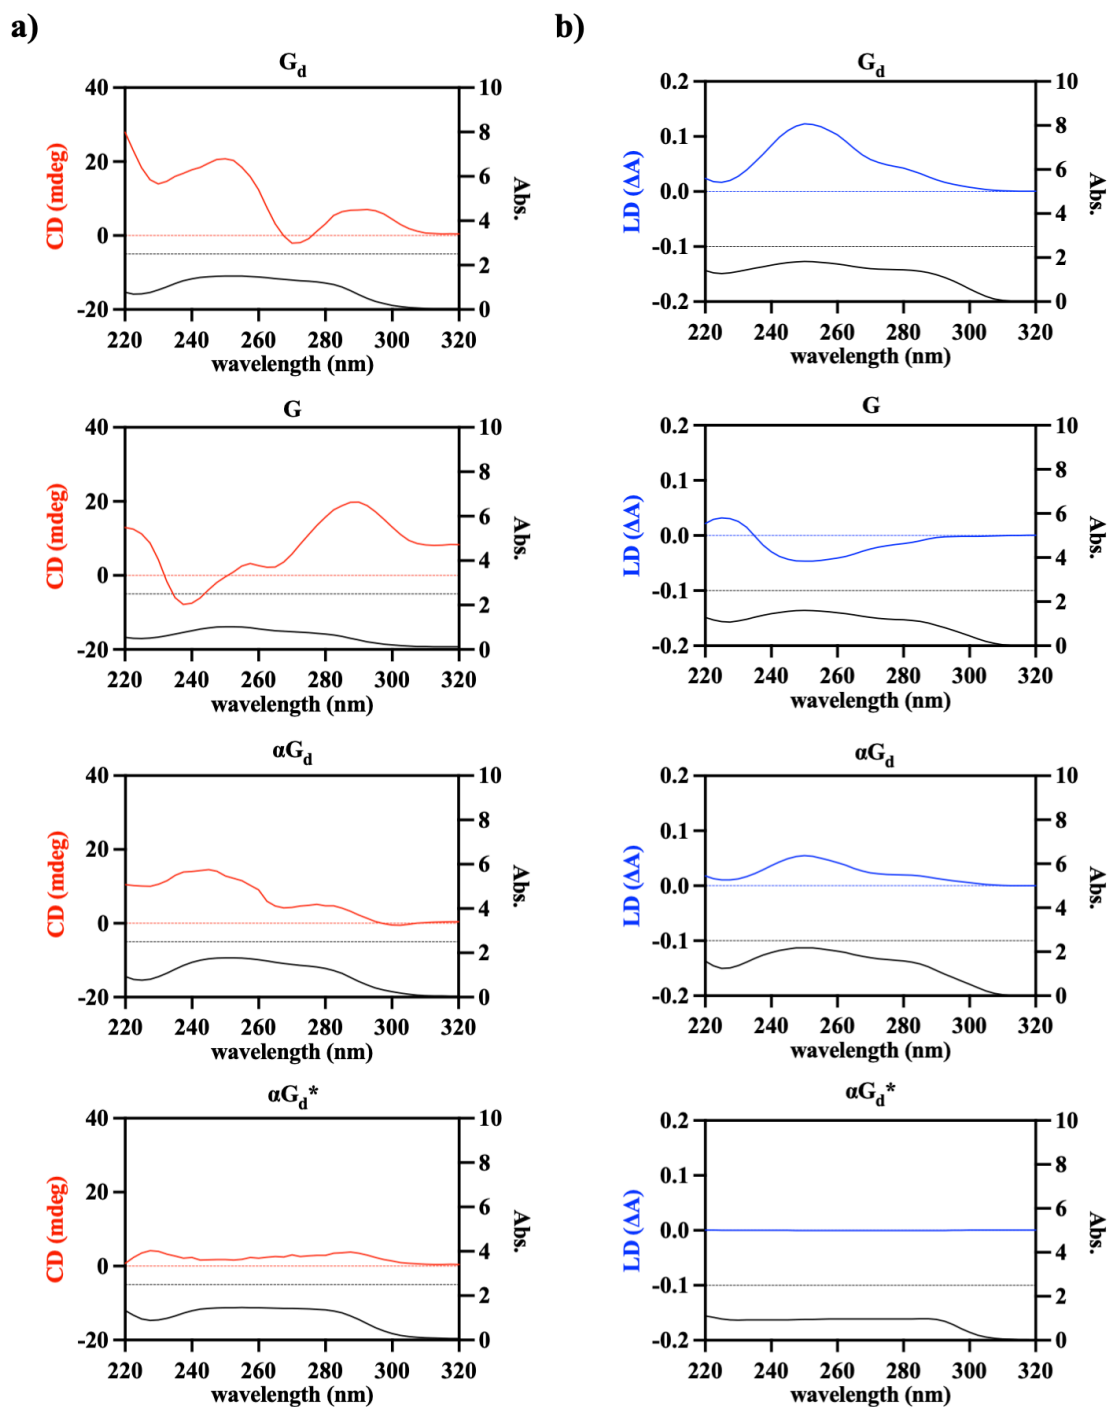

**Figure S2.** The CD, LD and UV-vis spectra of  $G_d$ ,  $G$ ,  $\alpha G_d$  hydrogel and  $\alpha G_d^*$  solution. a) CD and UV-vis spectra of each sample; b) LD and UV-vis spectra of each sample under the same conditions as the CD measurement. All absorbance values are  $<2.5$  (black dotted line)

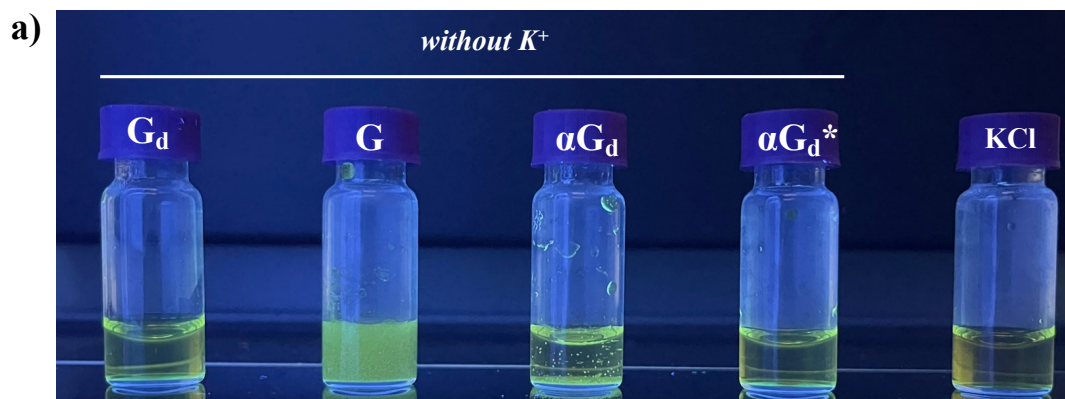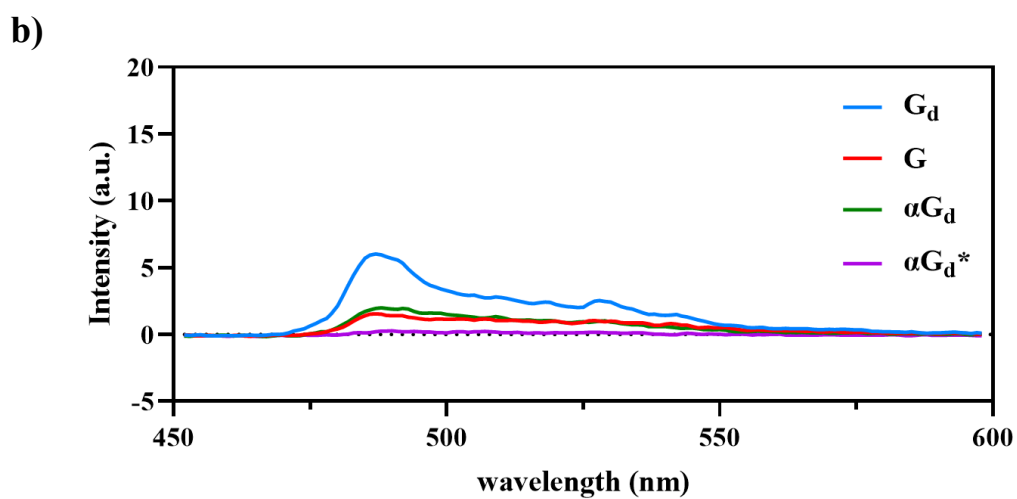

**Figure S3.** ThT-containing  $G_d$ ,  $G$ ,  $\alpha G_d$ , and  $\alpha G_d^*$  solution without  $K^+$ . a) Fluorescence was not observed in the absence of  $K^+$  at 365 nm ultraviolet light irradiation, and  $G$  exhibited precipitation due to its instability. b) Compared to the presence of  $K^+$ , no significant fluorescence intensity was observed. The concentration of ThT is 5 mmol/mL,  $\lambda_{ex} = 450$  nm.

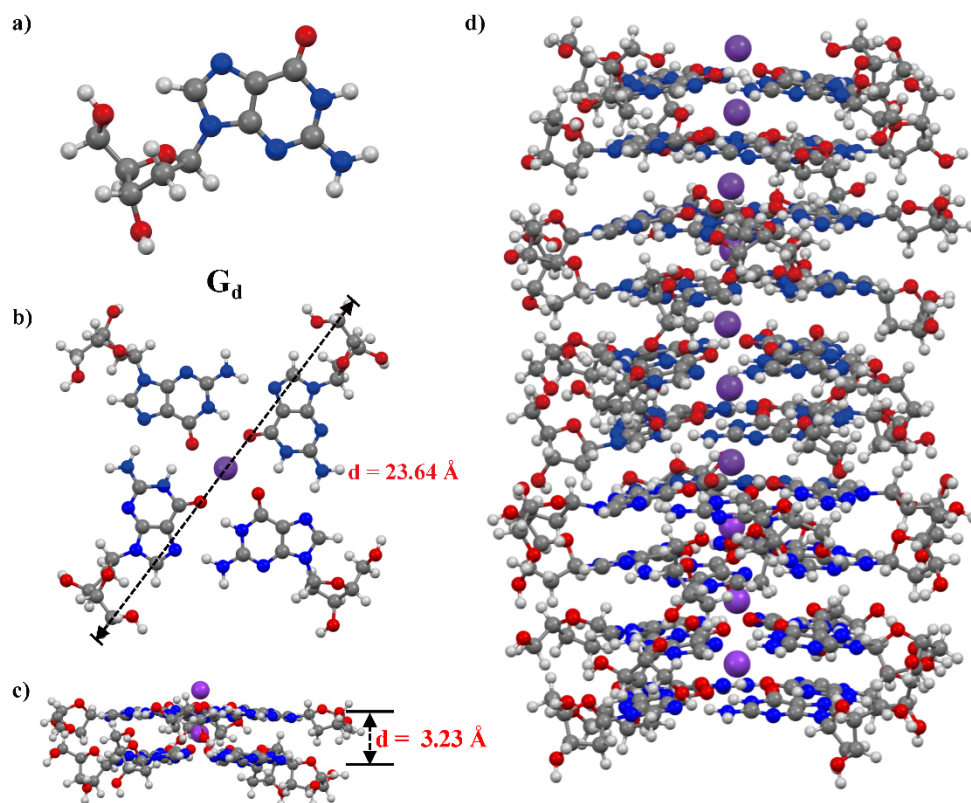

**Figure S4.** Structural modeling of various structures formed by  $G_d$ . a) the molecular structure of  $G_d$ . b) the G-quartet block structure under the mediation of potassium ions. c) the stacking structure formed by 2 layers of G-quartet blocks. d) the stacking structure composed of 10 layers of G-quartet blocks.

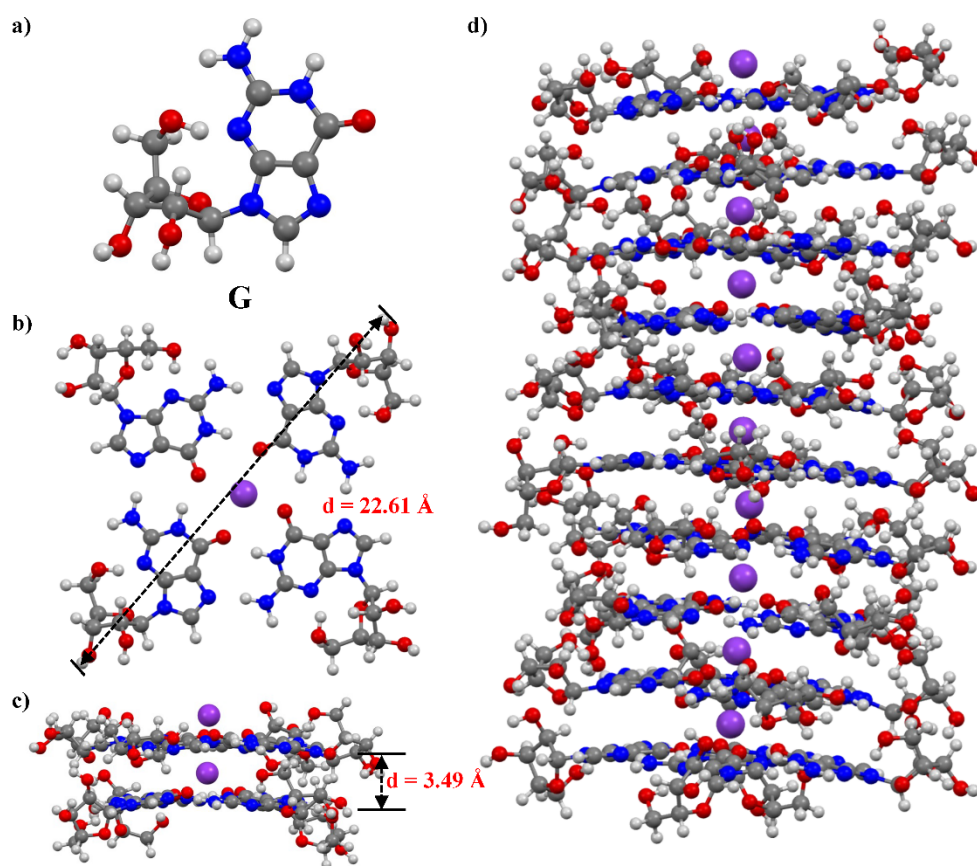

**Figure S5.** Structural modeling of various structures formed by **G**. a) the molecular structure of **G**. b) the G-quartet block structure under the mediation of potassium ions. c) the stacking structure formed by 2 layers of G-quartet blocks. d) the stacking structure composed of 10 layers of G-quartet blocks.



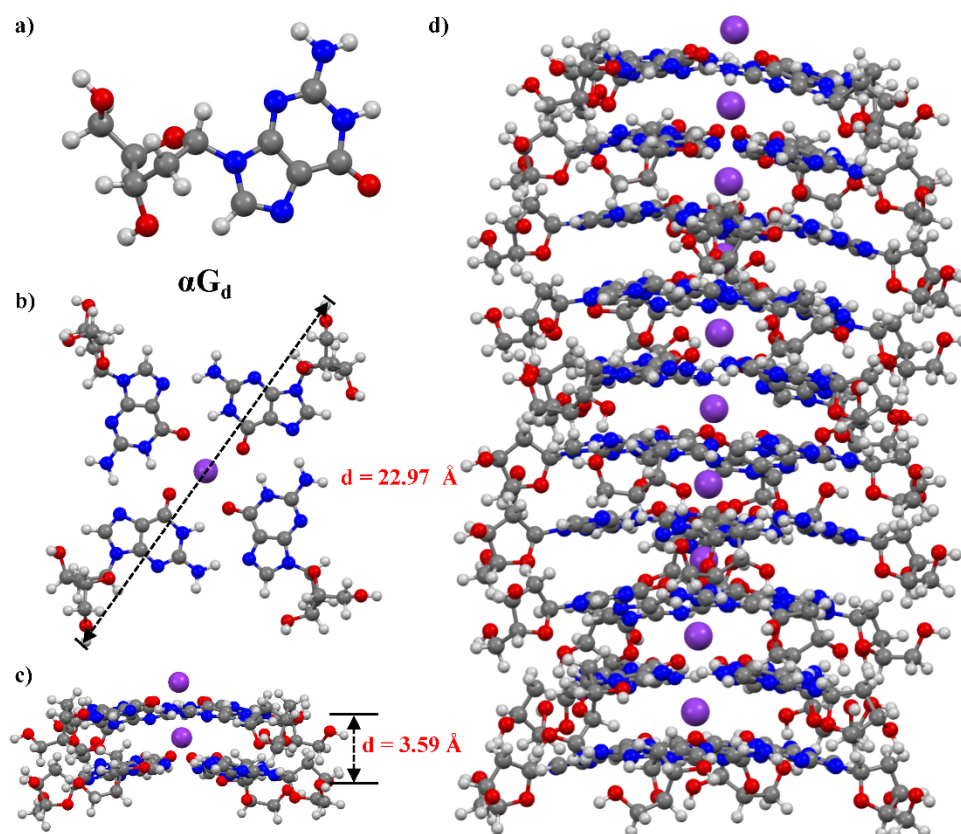

**Figure S6.** Structural modeling of various structures formed by  $\alpha\text{Gd}$ . a) the molecular structure of  $\alpha\text{Gd}$ . b) the G-quartet block structure under the mediation of potassium ions. c) the stacking structure formed by 2 layers of G-quartet blocks. d) the stacking structure composed of 10 layers of G-quartet blocks.



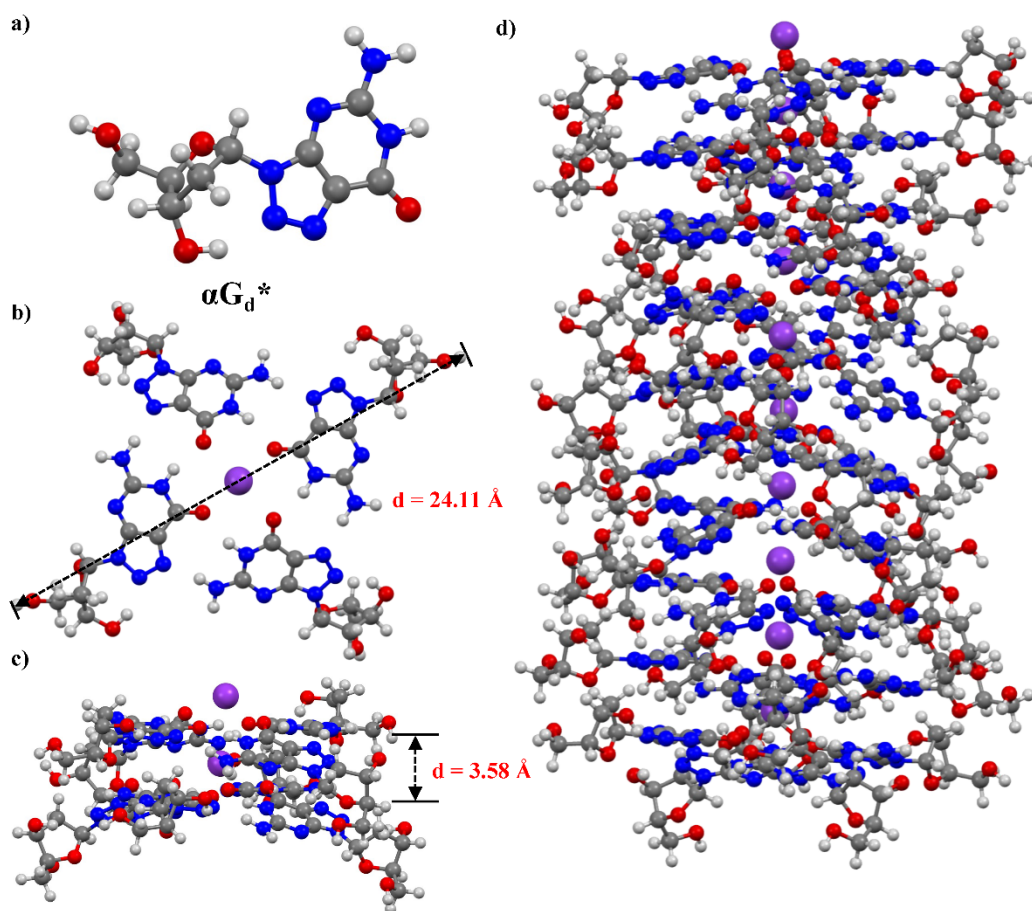

**Figure S7.** Structural modeling of various structures formed by  $\alpha G_d^*$ . a) the molecular structure of  $\alpha G_d^*$ . b) the G-quartet block structure under the mediation of potassium ions. c) the stacking structure formed by 2 layers of G-quartet blocks. d) the stacking structure composed of 10 layers of G-quartet blocks.

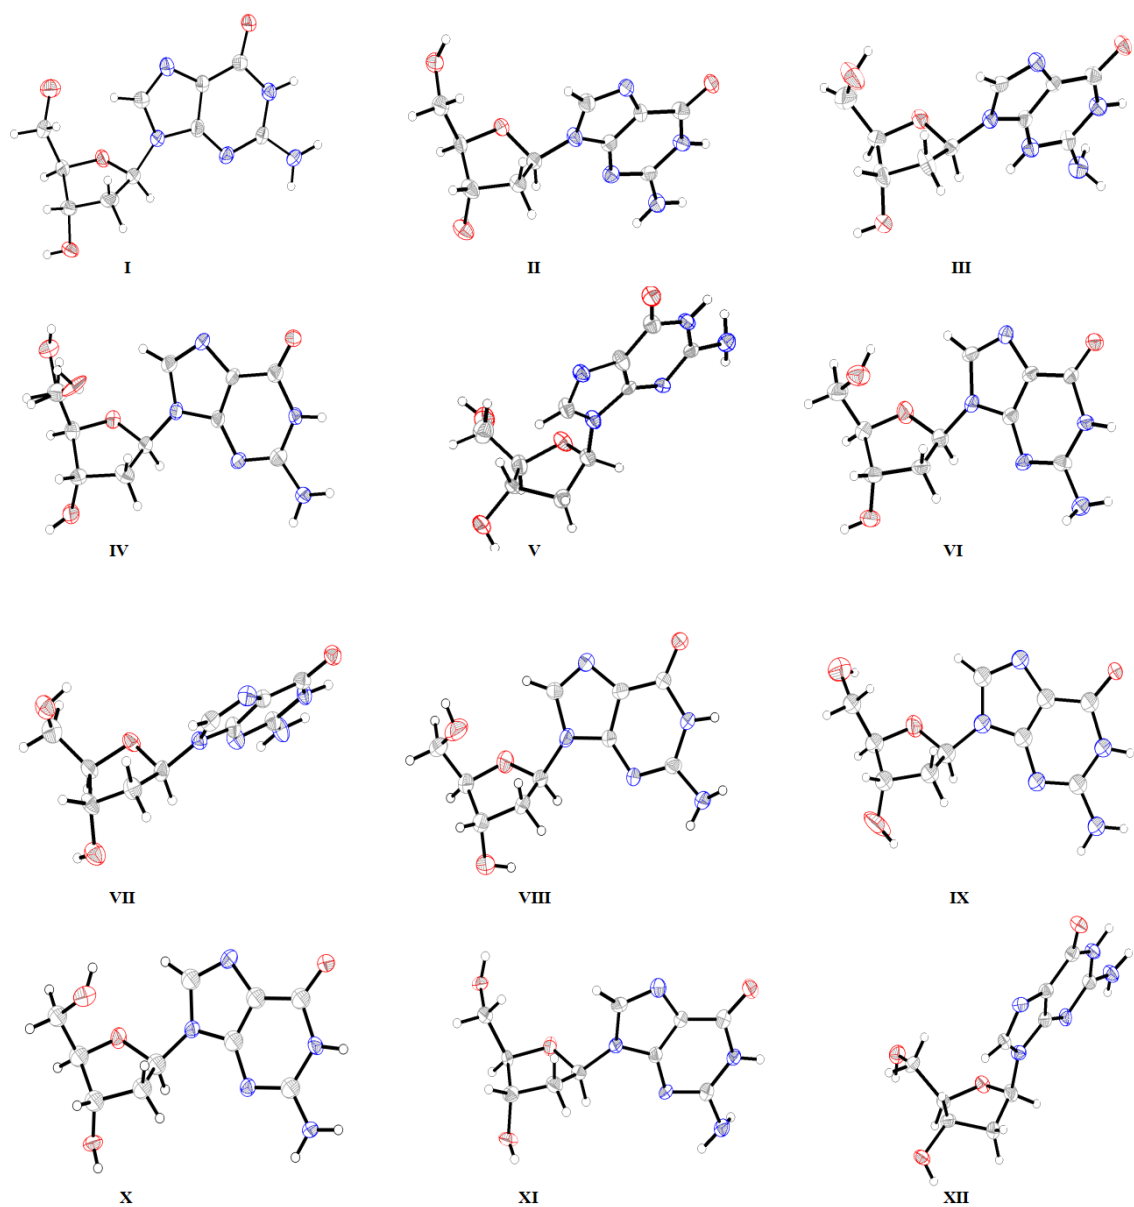

**Figure S8.** The single-crystal structures of  $G_d$  with 12 conformers from I to XII. C, N and O atoms were shown in Ellipsoid model, H atoms were shown in Global model.

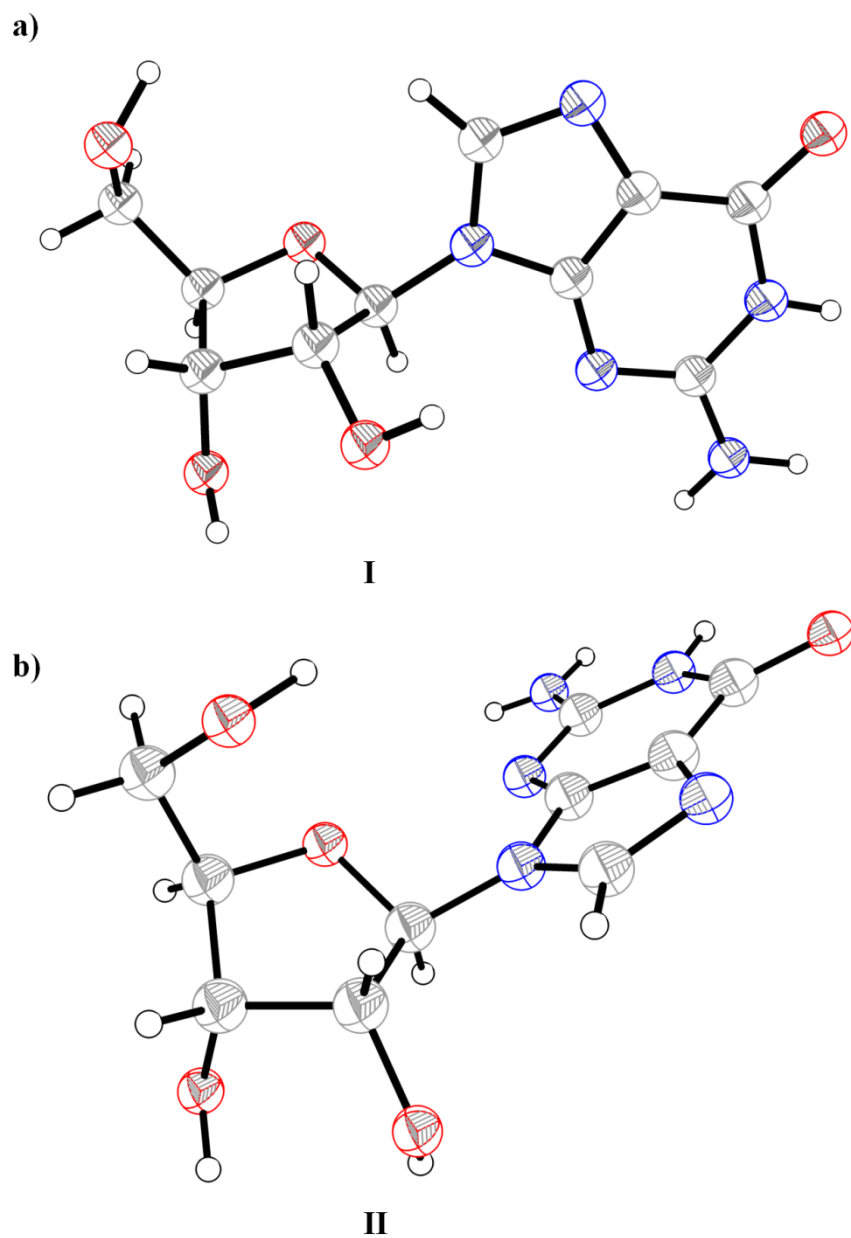

**Figure S9.** The single-crystal structures of **G** conformer I and II. X-ray single crystal data was got from reference,<sup>3</sup> atoms was shown in Ball and Stick Model.

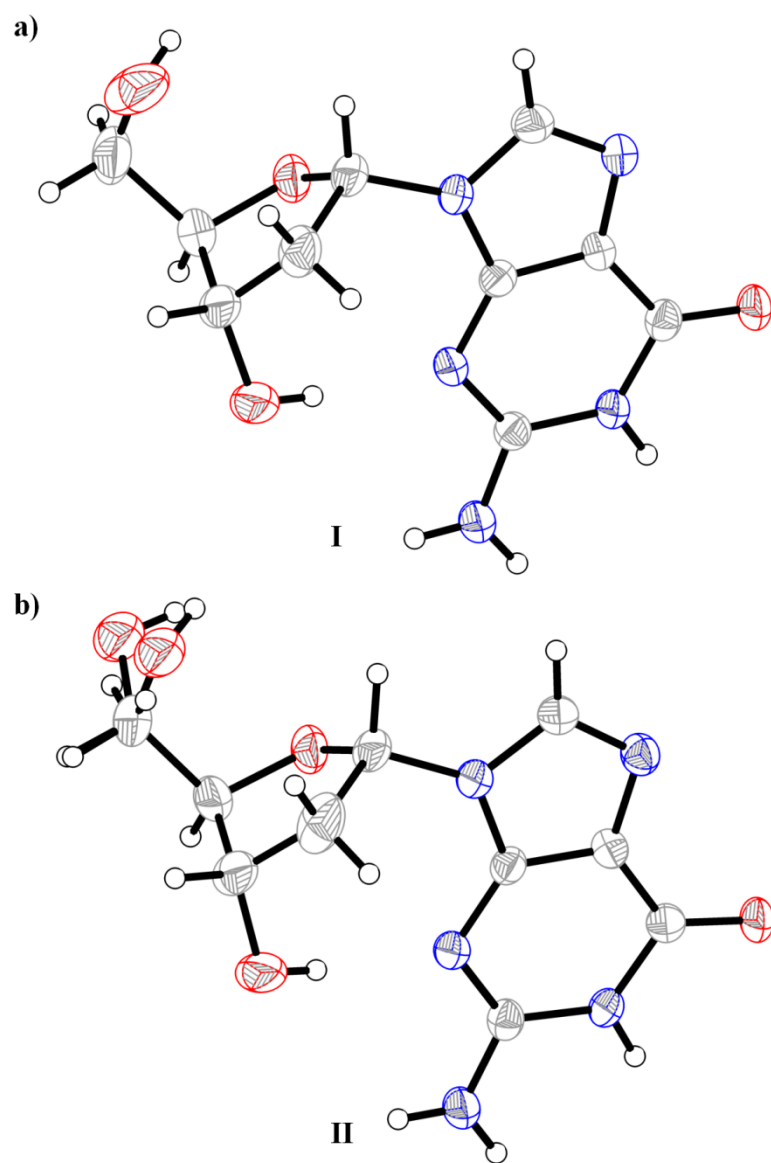

**Figure S10.** The single-crystal structures of  $\alpha G_d$  conformer I and conformer II. Atoms are shown in Ellipsoid Model, there was two kinds of C2'-C3' bond in conformer II. Atoms are coded as follows: red, oxygen; blue, nitrogen; gray, carbon; white, hydrogen.

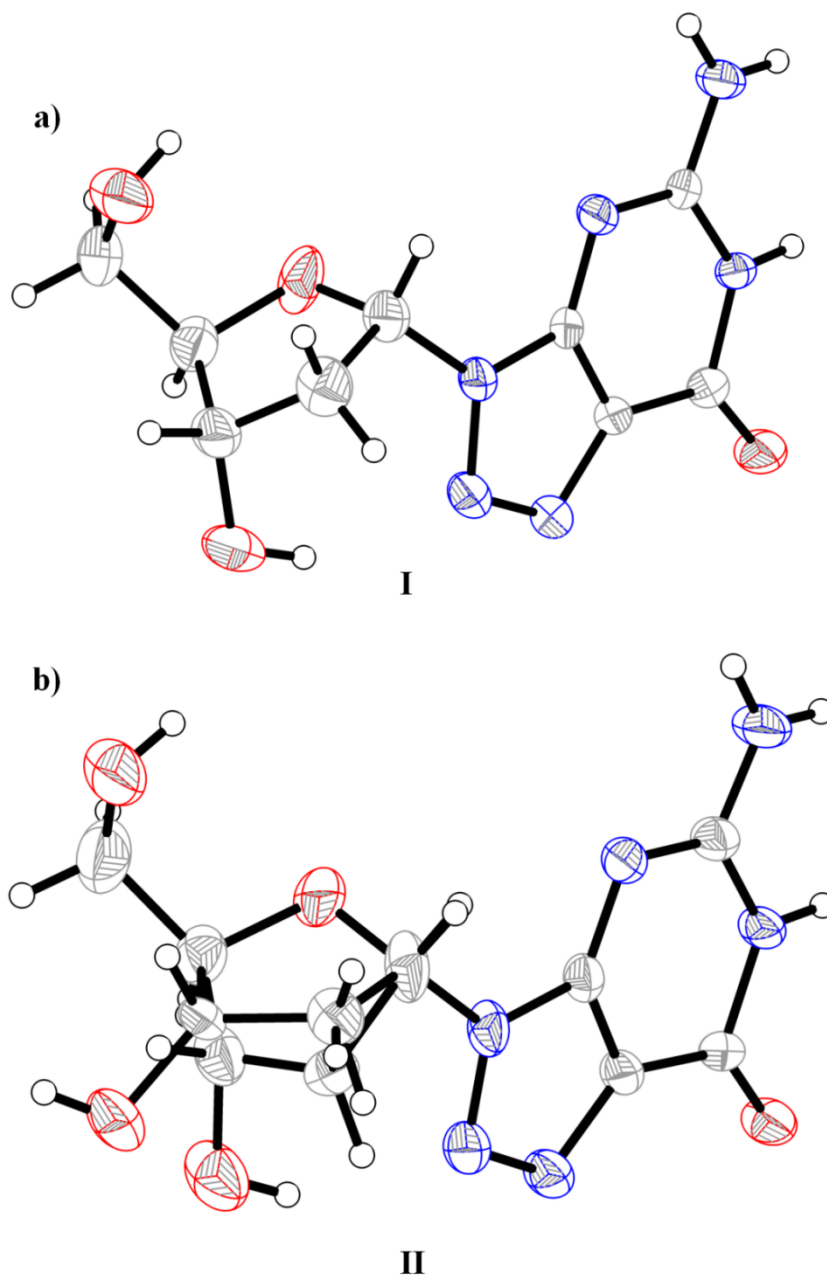

**Figure S11.** The single-crystal structures of  $\alpha\text{Gd}^*$  conformer I and conformer II. N, O, and C atoms were shown in Ellipsoid Model, H atoms were shown in Global. Atoms are coded as follows: red, oxygen; blue, nitrogen; gray, carbon; white, hydrogen.

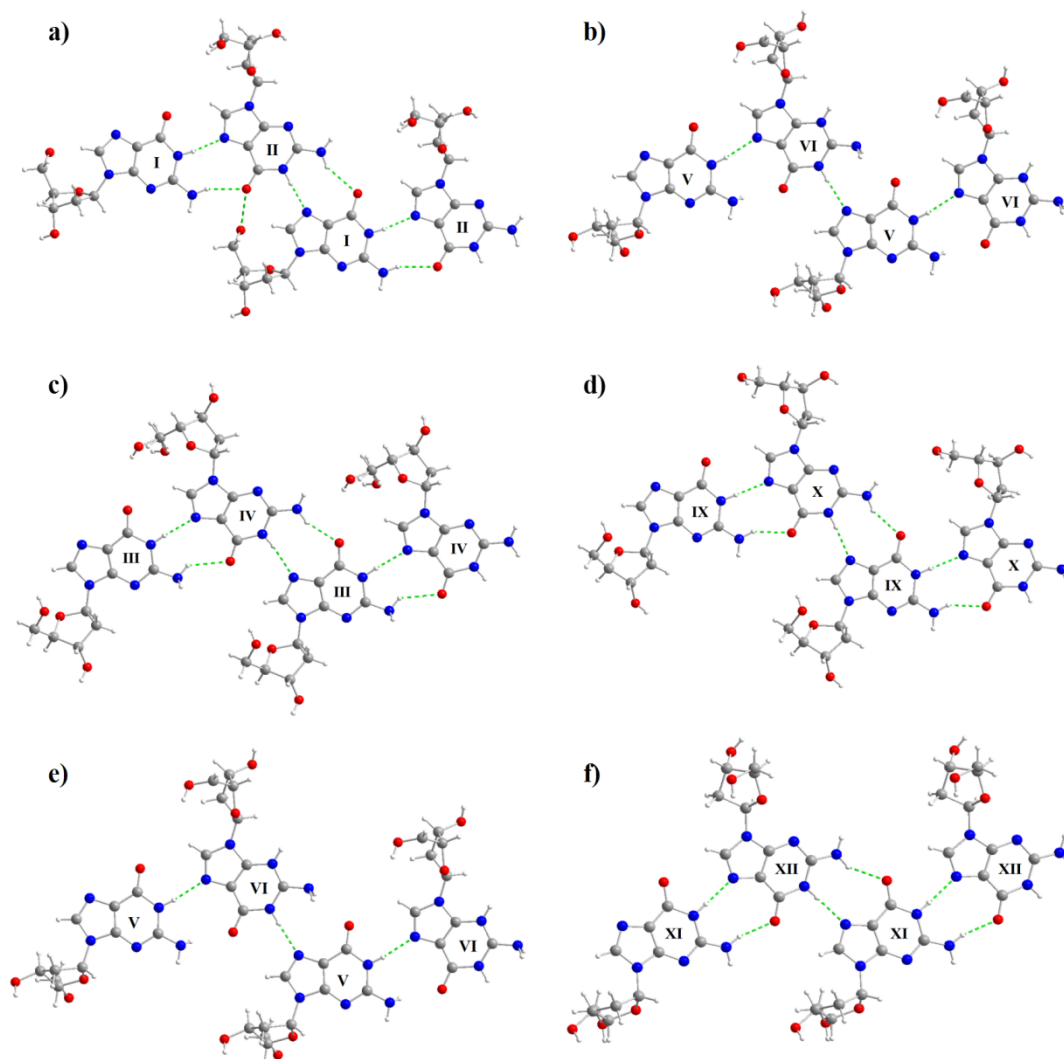

**Figure S12.** The base-pair pattern of  $G_d$  in the crystal. 6 base pairs show the same hydrogen bonds N1H---N7, N2H---O6. Atoms are coded as follows: red, oxygen; blue, nitrogen; gray, carbon; white, hydrogen.

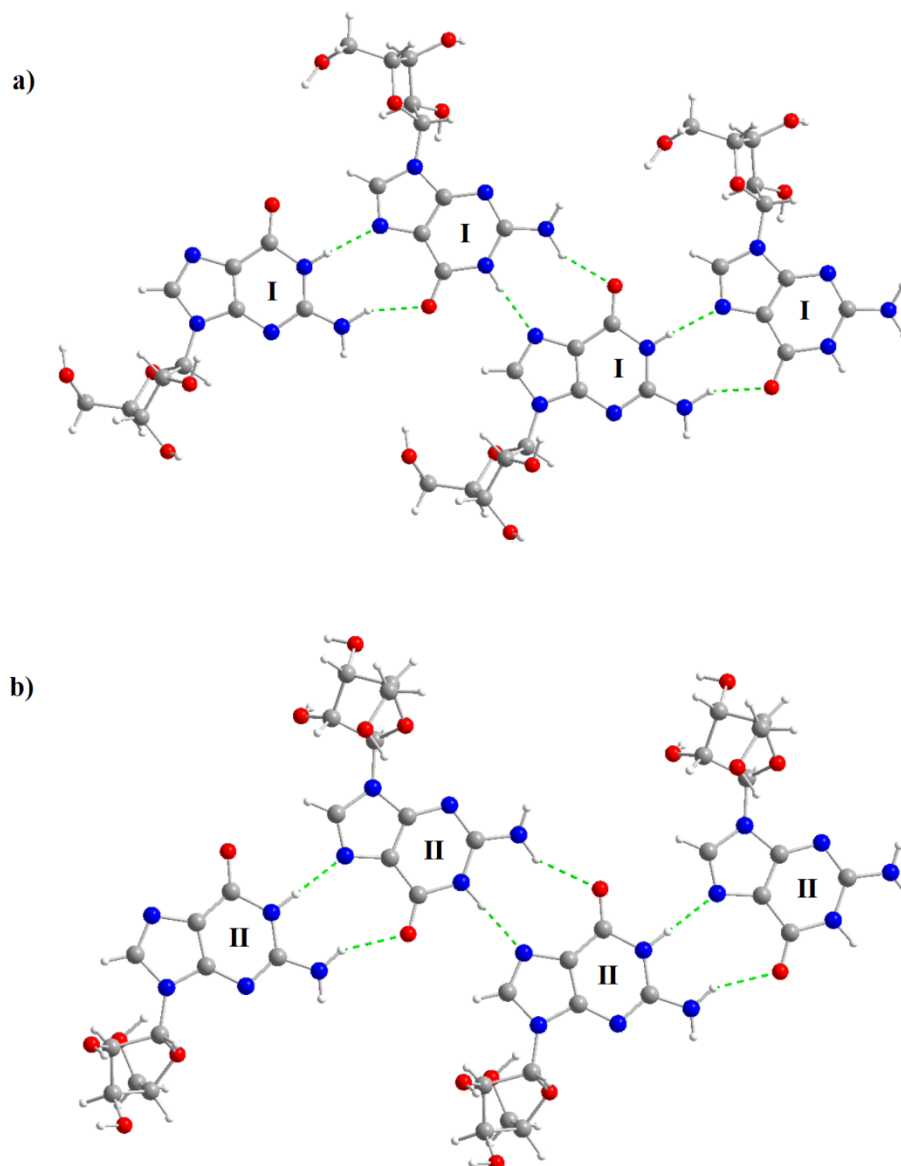

**Figure S13.** The base-pair pattern of **G** in the crystal. a) The repeated hydrogen bonds unit connecting conformers I; b) The repeated hydrogen bonds unit connecting conformers II. Atoms are coded as follows: red, oxygen; blue, nitrogen; gray, carbon; white, hydrogen.

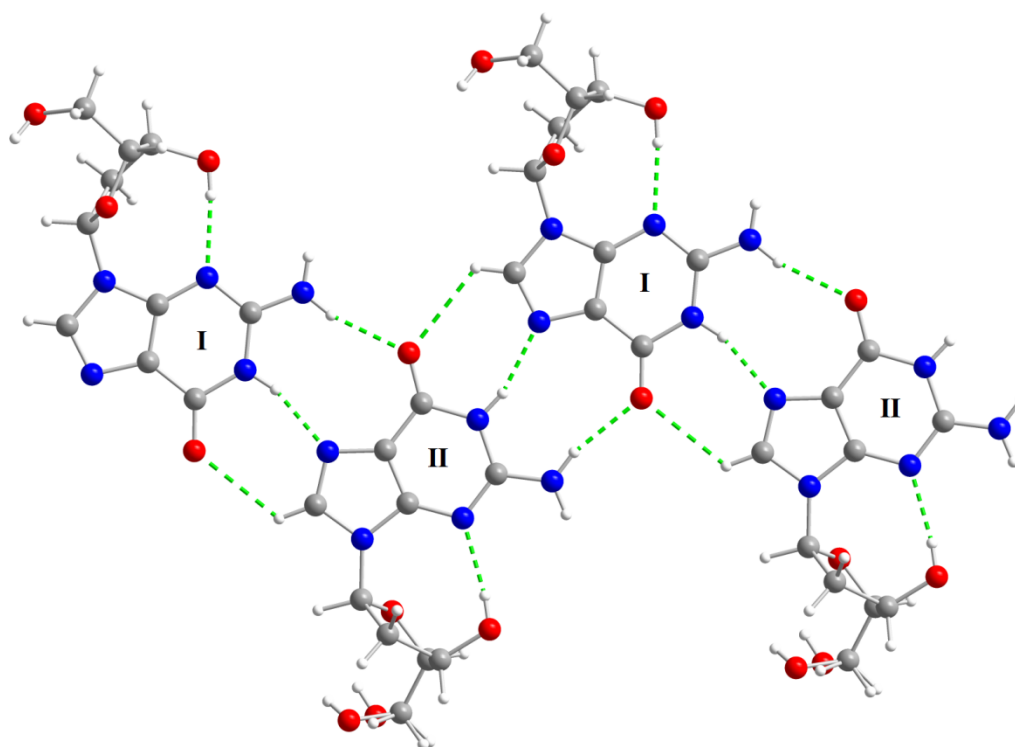

**Figure S14.** The base-pair pattern of  $\alpha G_d$  in the crystal. With participating of hydrogen bond between C8 and O6, the two conformers formed triple hydrogen bond base pairs. The repeated hydrogen bonds unit connecting conformers I and II together in the whole assembly is highlighted in green color. Atoms are coded as follows: red, oxygen; blue, nitrogen; gray, carbon; white, hydrogen.



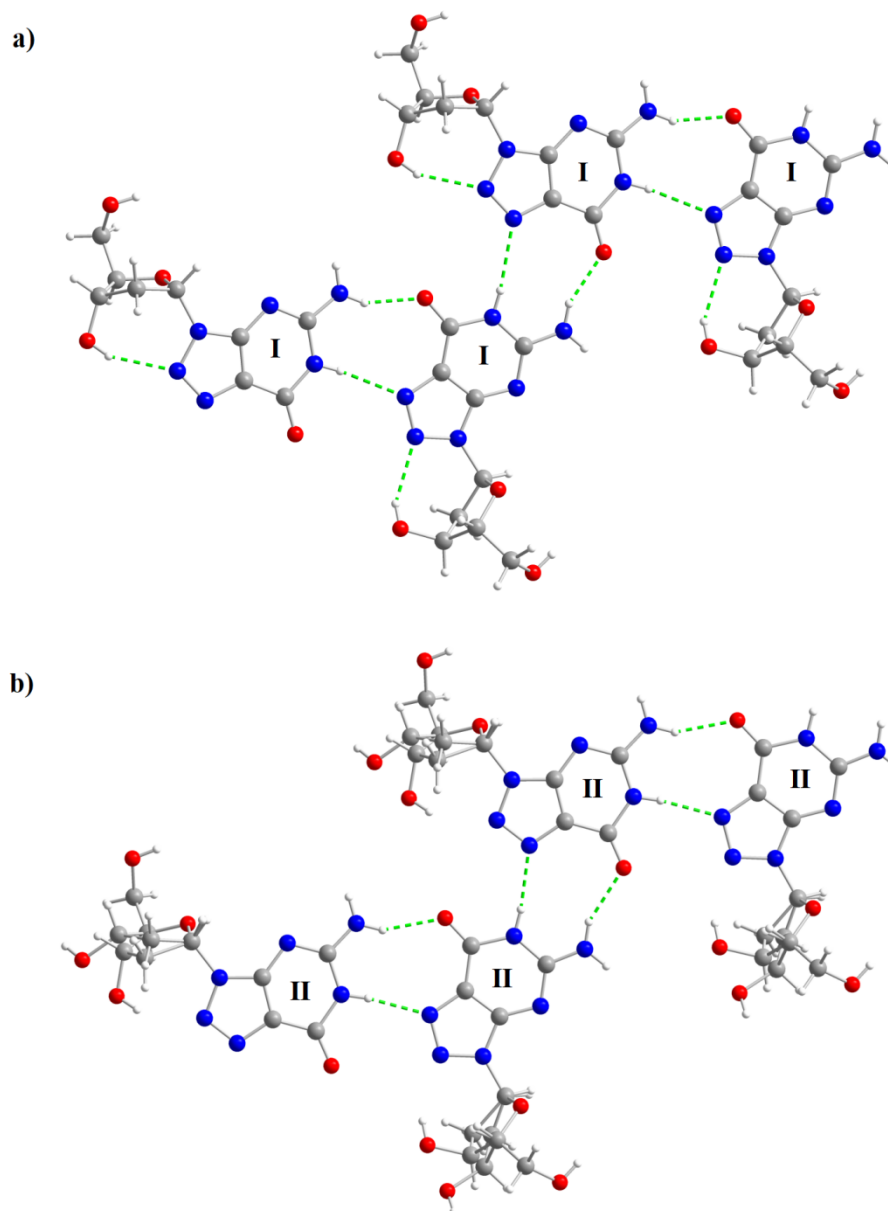

**Figure S15.** The base-pair pattern of  $\alpha\text{Gd}^*$  in the crystal. a) The repeated hydrogen bonds unit connecting conformers I; b) The repeated hydrogen bonds unit connecting conformers II. Atoms are coded as follows: red, oxygen; blue, nitrogen; gray, carbon; white, hydrogen.

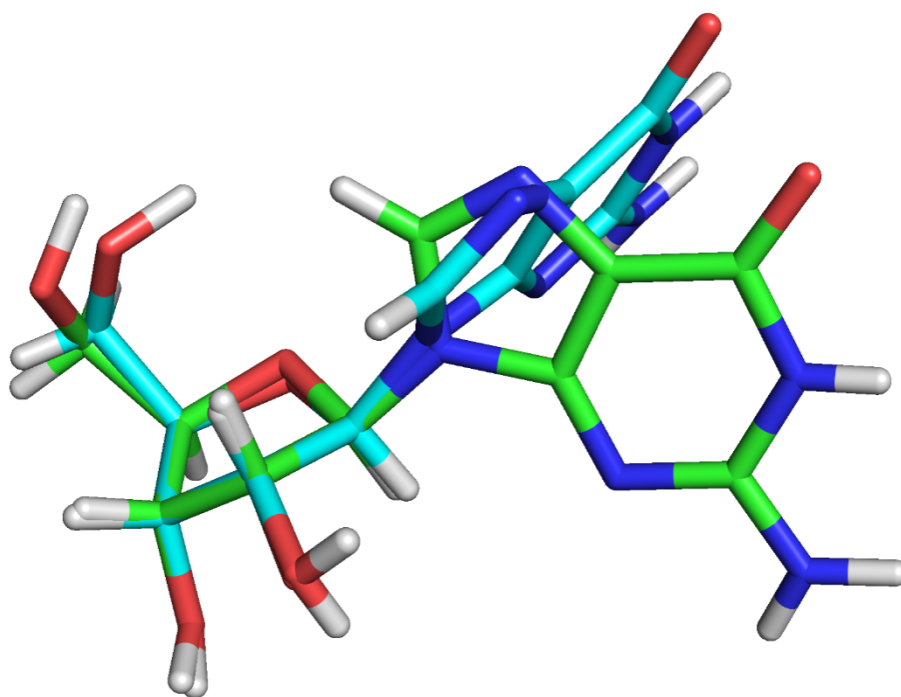

**Figure S16.** Sugar rings overlay results of two conformers of **G**.

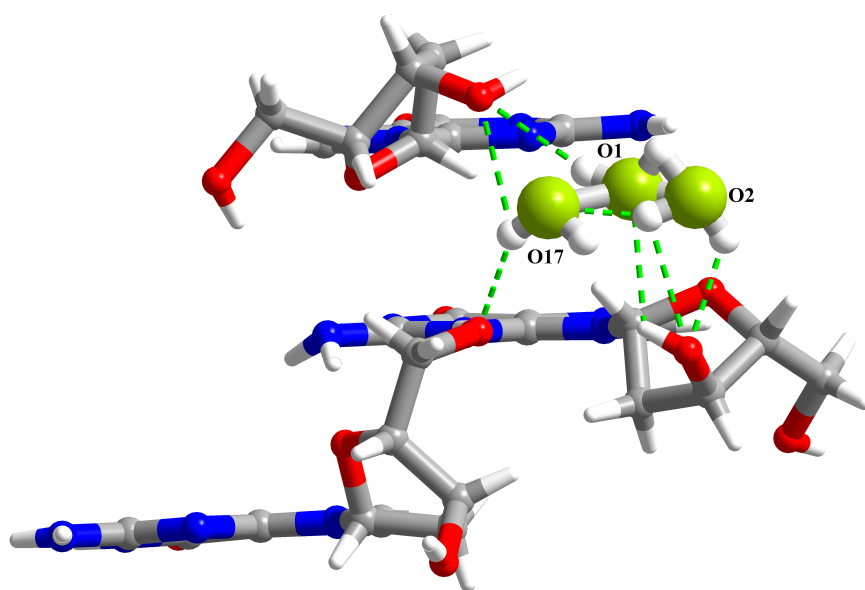

**Figure S17.** Disordered water in the  $G_d$  crystal. Oxygen of water was shown in Lime. Hydrogen bond was shown in light green dash line.

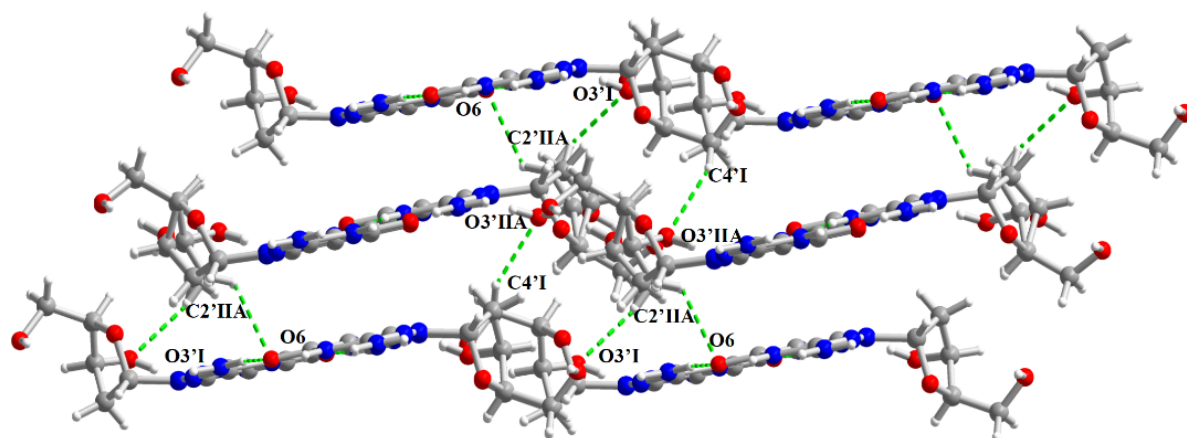

**Figure S18.** Base layers crosslink in  $\alpha G_d^*$  crystal without water. The hydrogen bond  $C2'H(II)A \cdots O6$ ,  $C2'(II)H \cdots O3'(I)$ ,  $C4'(I)H \cdots O3'(II)A$ , connected the base layers. Hydrogen bonds was shown in bright green. Atoms are coded as follows: red, oxygen; blue, nitrogen; gray, carbon; white, hydrogen.

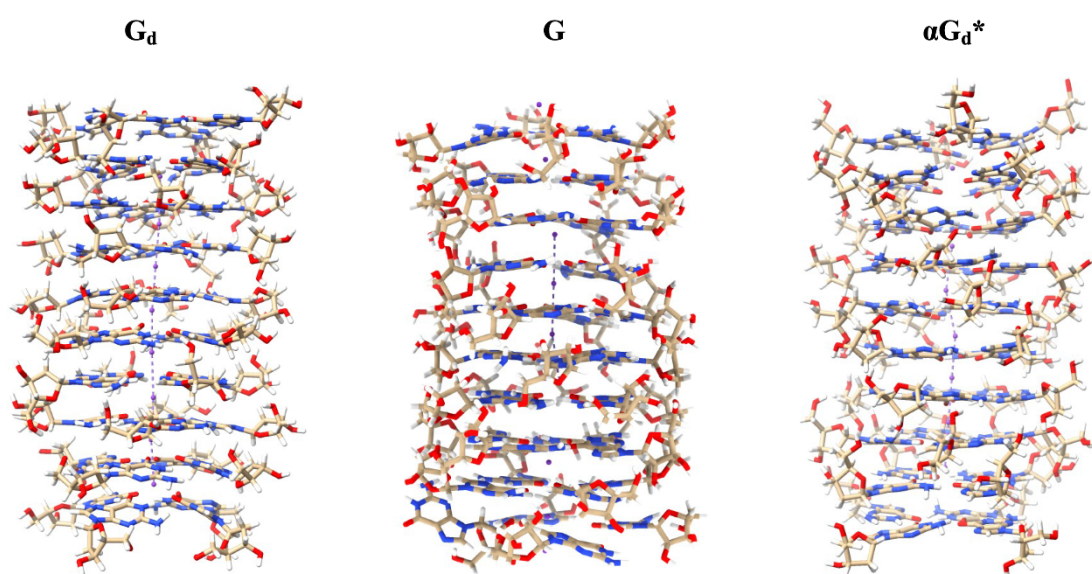

**Figure S19.** Snapshots of MD simulation ending state of  $G_d$ , G and  $\alpha G_d$ .

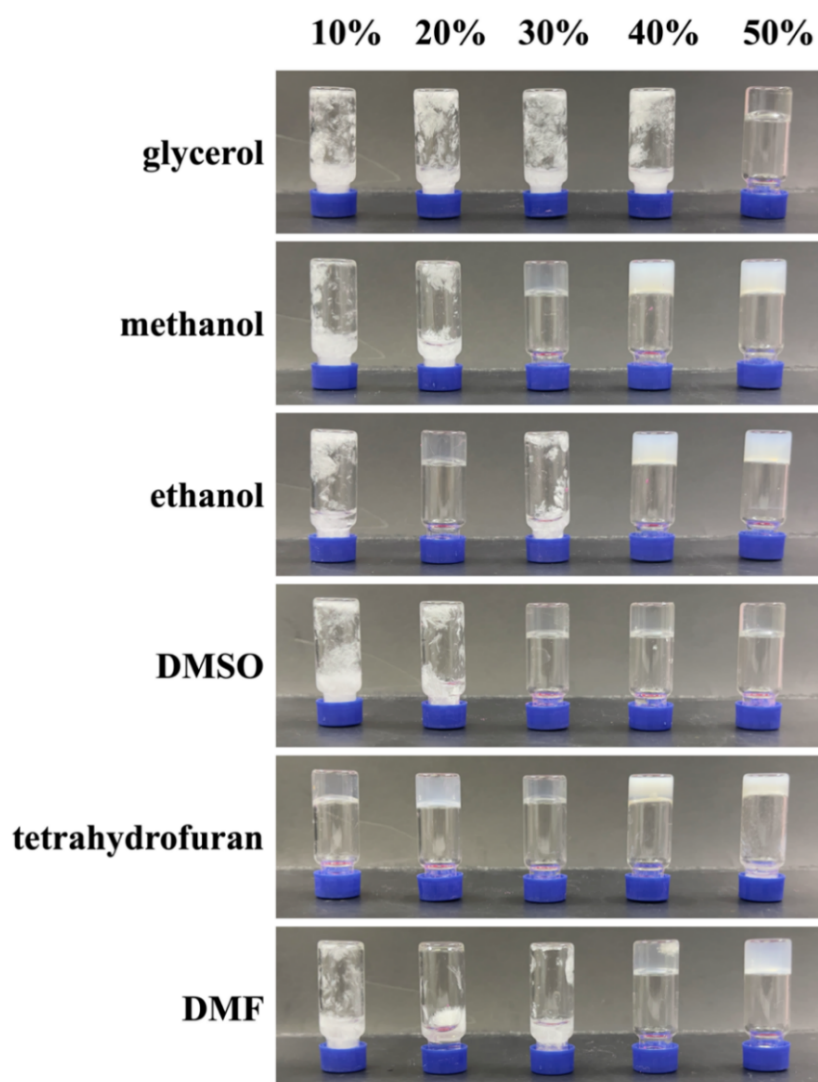

**Figure S20.** Gel formation of **G** in KCl solutions equipped with various organic solvents in different proportions. The concentration of **G** is 14 mg/mL and  $K^+$  0.2 mmol/mL in other analysis, The volume ratio of the organic solvent was varied from 10% to 50%.

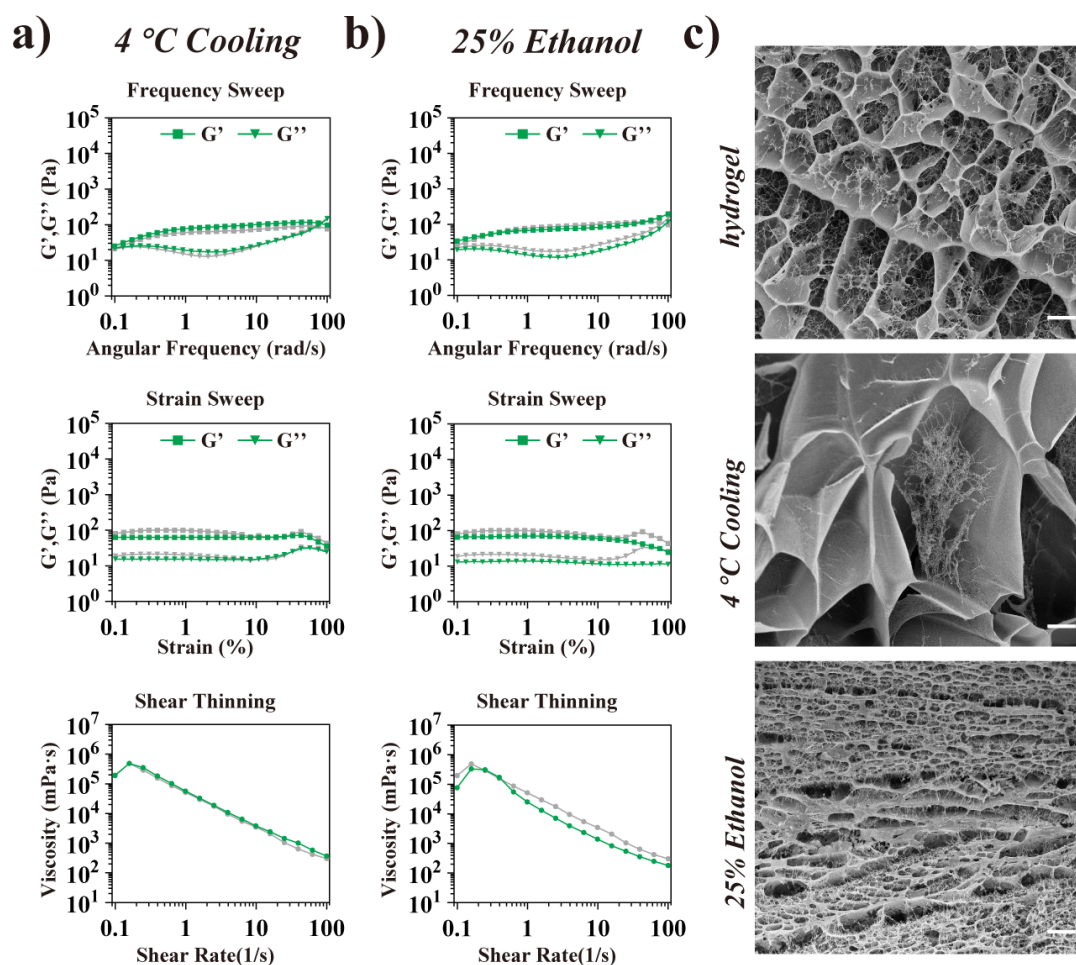

**Figure S21.** a-b) Rheological testing of  $\alpha G_d$  hydrogel prepared by the rapid cooling method (a) and organic solvents (b); the gray data represent the corresponding results for the hydrogels that without non-chemical modifications. c) Cryo-SEM imaging of the hydrogels prepared from  $\alpha G_d$  by different methods. The concentration of  $\alpha G_d$  is 14 mg/mL and the concentration of  $K^+$  is 0.2 mmol/mL in the hydrogels. (Scale bar = 5  $\mu$ m).

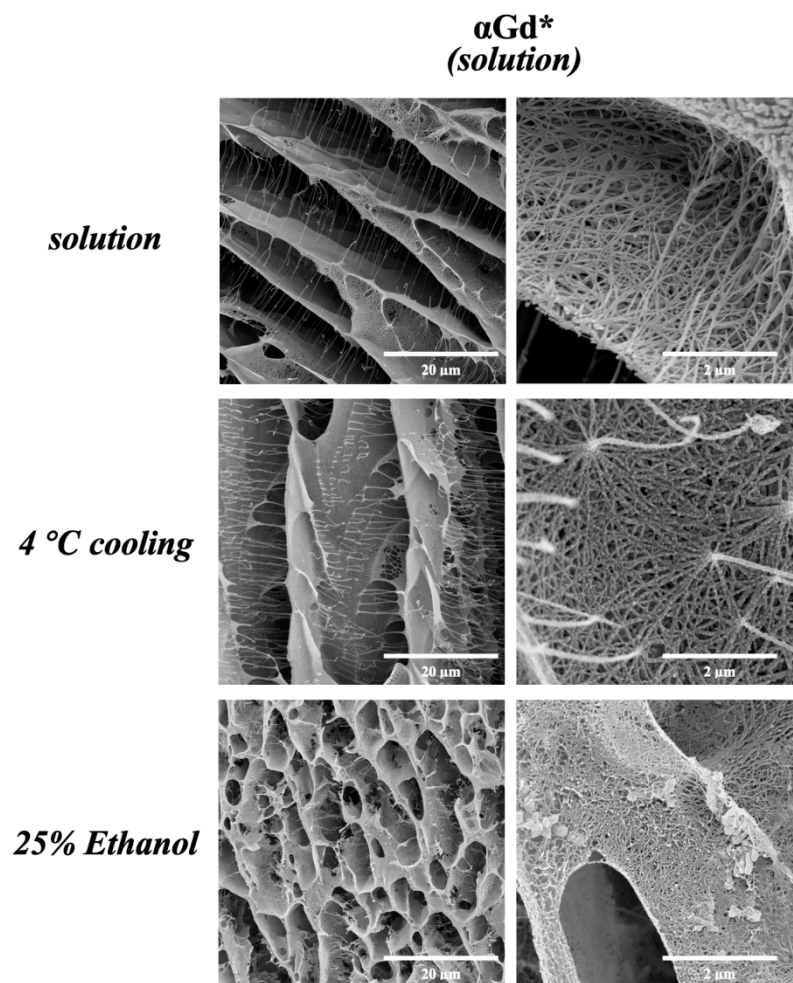

**Figure S22.** Cryo-SEM imaging of the  $\alpha\text{Gd}^*$  solution prepared by different methods. The concentration of  $\alpha\text{Gd}^*$  is 14 mg/mL and the concentration of  $\text{K}^+$  is 0.2 mmol/mL in the solution.

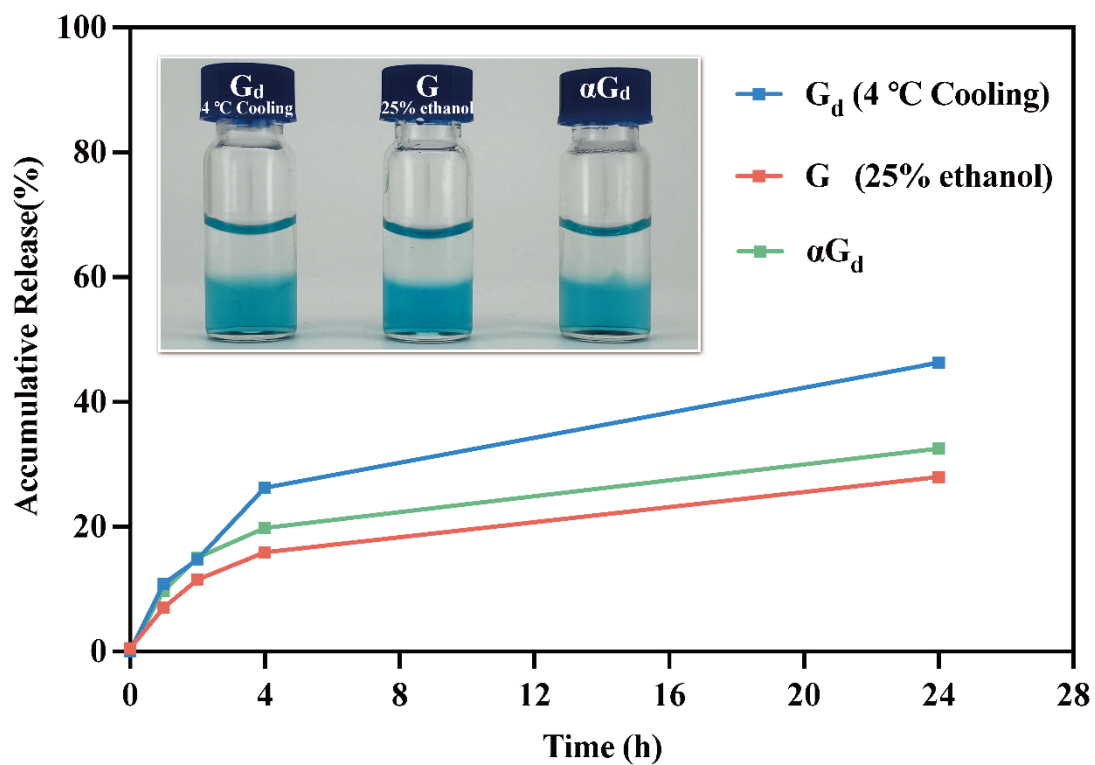

**Figure S23.** The methylene blue dye release experiment. The methylene blue within the hydrogels can be released slowly over a period of 24 hours. The concentration of  $G_d$ , G and  $\alpha G_d$  is 14 mg/mL, the concentration of  $K^+$  is 0.2 mmol/mL and the concentration of methylene blue is 0.4  $\mu\text{mol/mL}$ .



**Table S1.** Summary of X-ray crystallographic data for compounds **G<sub>d</sub>**, **αG<sub>d</sub>**, and **αG<sub>d</sub>\***.

|                                    | <b>G<sub>d</sub></b>                                                                                                                                   | <b>αG<sub>d</sub></b>                                                                                                                                       | <b>αG<sub>d</sub>*</b>                                       |
|------------------------------------|--------------------------------------------------------------------------------------------------------------------------------------------------------|-------------------------------------------------------------------------------------------------------------------------------------------------------------|--------------------------------------------------------------|
| Formula                            | C <sub>60</sub> H <sub>92</sub> N <sub>30</sub> O <sub>31</sub><br>(6C <sub>10</sub> H <sub>13</sub> N <sub>5</sub> O <sub>4</sub> ·7H <sub>2</sub> O) | C <sub>10</sub> H <sub>13.5</sub> N <sub>5</sub> O <sub>4.25</sub><br>(C <sub>10</sub> H <sub>13</sub> N <sub>5</sub> O <sub>4</sub> ·0.25H <sub>2</sub> O) | C <sub>9</sub> H <sub>12</sub> N <sub>6</sub> O <sub>4</sub> |
| FW                                 | 1729.63                                                                                                                                                | 271.76                                                                                                                                                      | 268.25                                                       |
| Crystal system                     | triclinic                                                                                                                                              | monoclinic                                                                                                                                                  | monoclinic                                                   |
| Space group                        | P1                                                                                                                                                     | C2                                                                                                                                                          | P2 <sub>1</sub>                                              |
| a (Å)                              | 10.6756(11)                                                                                                                                            | 10.9636(8)                                                                                                                                                  | 9.092(5)                                                     |
| b (Å)                              | 11.4060(12)                                                                                                                                            | 6.1525(5)                                                                                                                                                   | 11.218(5)                                                    |
| c (Å)                              | 33.093(3)                                                                                                                                              | 34.865(2)                                                                                                                                                   | 11.613(6)                                                    |
| α (°)                              | 85.849(3)                                                                                                                                              | 90                                                                                                                                                          | 90                                                           |
| β (°)                              | 87.833(3)                                                                                                                                              | 94.168(6)                                                                                                                                                   | 101.827(12)                                                  |
| γ (°)                              | 67.473(3)                                                                                                                                              | 90                                                                                                                                                          | 90                                                           |
| Cell volume (Å <sup>3</sup> )      | 3712.2(7)                                                                                                                                              | 2345.5(3)                                                                                                                                                   | 1159.4(10)                                                   |
| Calc. density (g/cm <sup>3</sup> ) | 1.547                                                                                                                                                  | 1.539                                                                                                                                                       | 1.537                                                        |
| Z                                  | 2                                                                                                                                                      | 8                                                                                                                                                           | 4                                                            |
| m (Mo-Kα)                          | 0.71073                                                                                                                                                | 0.71073                                                                                                                                                     | 0.71073                                                      |
| R <sub>int</sub>                   | 0.0356                                                                                                                                                 | 0.0146                                                                                                                                                      | 0.0466                                                       |
| R <sub>1</sub> (I > 2σ(I))         | 0.0692                                                                                                                                                 | 0.042                                                                                                                                                       | 0.0635                                                       |
| wR <sub>2</sub>                    | 0.163                                                                                                                                                  | 0.0929                                                                                                                                                      | 0.1602                                                       |
| GOF                                | 1.072                                                                                                                                                  | 1.085                                                                                                                                                       | 1.02                                                         |
| Temperature (K)                    | 173                                                                                                                                                    | 293.15                                                                                                                                                      | 220                                                          |
| Wavelength (Å)                     | 0.71073                                                                                                                                                | 0.71073                                                                                                                                                     | 0.71073                                                      |
| Crystal size (mm)                  | 0.05 × 0.04 × 0.02                                                                                                                                     | 0.35 × 0.3 × 0.25                                                                                                                                           | 0.08 × 0.03 × 0.01                                           |
| μ (mm <sup>-1</sup> )              | 0.126                                                                                                                                                  | 0.123                                                                                                                                                       | 0.124                                                        |
| F(000)                             | 1820                                                                                                                                                   | 1140                                                                                                                                                        | 560                                                          |
| Reflections with I > 2σ(I)         | 16511                                                                                                                                                  | 5351                                                                                                                                                        | 10294                                                        |
| Independent reflections            | 20262                                                                                                                                                  | 3945                                                                                                                                                        | 5218                                                         |
| CCDC.                              | 2311975                                                                                                                                                | 2311973                                                                                                                                                     | 2311972                                                      |

**Table S2.** The length and angle of hydrogen bonds for base pairs in nucleoside crystals.

|                        | <b>N1H---N7</b>     | <b>D---A</b><br>(Å) | <b>(D)H---A</b><br>(Å) | <b>&lt;DHA</b><br>(°) | <b>N2H---O6</b>                  | <b>D---A</b><br>(Å) | <b>(D)H---A</b><br>(Å) | <b>&lt;DHA</b><br>(°) |
|------------------------|---------------------|---------------------|------------------------|-----------------------|----------------------------------|---------------------|------------------------|-----------------------|
| <b>G<sub>d</sub></b>   | N1H(I)---N7(II)     | 2.7593              | 1.8844                 | 172.399               | N2H(I)---O6(II)                  | 3.0277              | 2.1973                 | 157.331               |
|                        | N1H(II)---N7(I)     | 2.7307              | 1.8527                 | 174.368               | N2H(II)---O6(I)                  | 3.0642              | 2.2565                 | 152.560               |
|                        | N1H(III)---N7(IV)   | 2.8225              | 1.9457                 | 174.676               | N2H(III)---O6(IV)                | 2.9518              | 2.2731                 | 133.882               |
|                        | N1H(IV)---N7(III)   | 2.9122              | 2.0410                 | 170.786               | N2H(IV)---O6(III)                | 2.9234              | 2.0865                 | 158.686               |
|                        | N1H(V)---N7(VI)     | 2.8864              | 2.0105                 | 172.768               | N2H(V)---O6(VI) <sup>a</sup>     | 2.8290              | 2.3846                 | 111.550               |
|                        | N1H(VI)---N7(V)     | 2.8778              | 2.0040                 | 172.453               | N2H(VI)---O6(V) <sup>a</sup>     | 2.8994              | 2.3770                 | 118.240               |
|                        | N1H(VII)---N7(VIII) | 2.8053              | 1.9264                 | 176.585               | N2H(VII)---O6(VIII) <sup>a</sup> | 2.9536              | 2.5376                 | 107.021               |
|                        | N1H(VIII)---N7(VII) | 2.7795              | 1.9006                 | 177.100               | N2H(VIII)---O6(VII)              | 2.9121              | 2.2693                 | 129.523               |
|                        | N1H(IX)---N7(X)     | 2.8235              | 1.9428                 | 177.595               | N2H(IX)---O6(X)                  | 2.8953              | 2.1022                 | 149.075               |
|                        | N1H(X)---N7(IX)     | 2.8672              | 1.9898                 | 175.356               | N2H(X)---O6(IX)                  | 2.872               | 2.0522                 | 154.454               |
|                        | N1H(XI)---N7(XII)   | 2.7913              | 1.9148                 | 174.398               | N2H(XI)---O6(XII)                | 2.8942              | 2.0601                 | 162.019               |
|                        | N1H(XII)---N7(XI)   | 2.8437              | 1.9729                 | 169.664               | N2H(XII)---O6(XI)                | 2.9372              | 2.1266                 | 153.023               |
| <b>G</b>               | N1H(I)---N7(I)      | 2.8166              | 1.9513                 | 175.262               | N2H(I)---O6(I)                   | 2.9179              | 2.0011                 | 152.243               |
|                        | N1H(II)---N7(II)    | 2.8759              | 1.9379                 | 178.589               | N2H(II)---O6(II)                 | 2.9900              | 2.1451                 | 151.181               |
| <b>αG<sub>d</sub></b>  | N1H(I)---N7(II)     | 2.7592              | 1.9263                 | 162.901               | N2H(I)---O6(II)                  | 2.9028              | 2.0586                 | 166.910               |
|                        | N1H(II)---N7(I)     | 2.7516              | 1.9166                 | 163.532               | N2H(II)---O6(I)                  | 2.9000              | 2.0589                 | 165.940               |
| <b>αG<sub>d</sub>*</b> | N1H(I)---N7(I)      | 3.1489              | 2.2821                 | 173.944               | N2H(I)---O6(I)                   | 2.7343              | 1.9249                 | 154.153               |
|                        | N1H(II)---N7(II)    | 2.9365              | 2.0744                 | 171.117               | N2H(II)---O6(II)                 | 2.8590              | 2.0441                 | 155.536               |

<sup>a</sup>As the angle of N2H---O6 or distance between the H to O6 didn't conform to normal hydrogen bonds, there is no hydrogen bonds between N2H---O6 in the crystals.

**Table S3.** Conformers and their conformation of G compounds in crystals.

| Compounds                                | Conformers | $\gamma^a$ (°)<br>(O5'-C5'-C4'-C3') | $\chi^b$ (°)<br>(O4'-C1'-N9-C4) | Orientation<br>Model | Pseudorotation<br>phase angle (°)<br>(P) | Twist form                                                                                                                             |
|------------------------------------------|------------|-------------------------------------|---------------------------------|----------------------|------------------------------------------|----------------------------------------------------------------------------------------------------------------------------------------|
| <b>G<sub>d</sub></b>                     | I          | 161.13                              | -112.19                         | <i>anti</i>          | 199.33                                   | C3'- <i>exo</i> -C4'- <i>endo</i> ( <sup>3</sup> T <sup>4</sup> )                                                                      |
|                                          | II         | 175.45                              | -111.73                         | <i>anti</i>          | 154.58                                   | C2'- <i>endo</i> -C1'- <i>exo</i> ( <sup>2</sup> T <sub>1</sub> )                                                                      |
|                                          | III        | 56.33                               | -179.21                         | <i>anti</i>          | 170.51                                   | C2'- <i>endo</i> -C3'- <i>exo</i> ( <sup>2</sup> T <sub>3</sub> )                                                                      |
|                                          | IV         | 178.43<br>46.39                     | -162.57                         | <i>anti</i>          | 195.90                                   | C3'- <i>exo</i> -C2'- <i>endo</i> ( <sup>3</sup> T <sup>2</sup> )                                                                      |
|                                          | V          | -167.93                             | -87.27                          | <i>high anti</i>     | 6.01                                     | C3'- <i>endo</i> -C2'- <i>exo</i> ( <sup>3</sup> T <sub>2</sub> )                                                                      |
|                                          | VI         | 47.17                               | -90.12                          | <i>high anti</i>     | 146.51                                   | C2'- <i>endo</i> -C1'- <i>exo</i> ( <sup>2</sup> T <sub>1</sub> )                                                                      |
|                                          | VII        | -176.30                             | -113.89                         | <i>anti</i>          | 159.91                                   | C2'- <i>endo</i> -C1'- <i>exo</i> ( <sup>2</sup> T <sub>1</sub> )                                                                      |
|                                          | VIII       | 49.68                               | -155.35                         | <i>anti</i>          | 181.19                                   | C3'- <i>exo</i> -C2'- <i>endo</i> ( <sup>3</sup> T <sup>2</sup> )                                                                      |
|                                          | IX         | 58.03                               | -178.84                         | <i>anti</i>          | 172.60                                   | C2'- <i>endo</i> -C3'- <i>exo</i> ( <sup>2</sup> T <sub>3</sub> )                                                                      |
|                                          | X          | -175.34                             | -155.95                         | <i>anti</i>          | 147.24                                   | C2'- <i>endo</i> -C1'- <i>exo</i> ( <sup>2</sup> T <sub>1</sub> )                                                                      |
|                                          | XI         | -161.94                             | -82.99                          | <i>high anti</i>     | 344.67                                   | C2'- <i>exo</i> -C3'- <i>endo</i> ( <sup>2</sup> T <sup>3</sup> )                                                                      |
|                                          | XII        | 43.99                               | -72.69                          | <i>high anti</i>     | 134.32                                   | C1'- <i>exo</i> -C2'- <i>endo</i> ( <sup>1</sup> T <sup>2</sup> )                                                                      |
| <b>G</b>                                 | I          | 46.44                               | -137.19                         | <i>anti</i>          | 138.37                                   | C1'- <i>exo</i> -C2'- <i>endo</i> ( <sup>1</sup> T <sup>2</sup> )                                                                      |
|                                          | II         | 67.94                               | -58.08                          | <i>syn</i>           | 161.01                                   | C2'- <i>endo</i> -C1'- <i>exo</i> ( <sup>2</sup> T <sub>1</sub> )                                                                      |
| <b><math>\alpha</math>G<sub>d</sub></b>  | I          | 63.36                               | -57.87                          | <i>syn</i>           | 222.49                                   | C4'- <i>endo</i> -C3'- <i>exo</i> ( <sup>4</sup> T <sub>3</sub> )                                                                      |
|                                          | II         | 70.05<br>163.97                     | -58.12                          | <i>syn</i>           | 220.50                                   | C4'- <i>endo</i> -C3'- <i>exo</i> ( <sup>4</sup> T <sub>3</sub> )                                                                      |
| <b><math>\alpha</math>G<sub>d</sub>*</b> | I          | 55.39                               | 81.97                           | <i>high anti</i>     | 167.11                                   | C2'- <i>endo</i> -C3'- <i>exo</i> ( <sup>2</sup> T <sub>3</sub> )                                                                      |
|                                          | II         | 65.82<br>53.63                      | 76.90                           | <i>high anti</i>     | 94.34<br>91.01                           | C1'- <i>exo</i> -O4'- <i>endo</i> ( <sup>0</sup> T <sub>1</sub> )<br>C1'- <i>exo</i> -O4'- <i>endo</i> ( <sup>0</sup> T <sub>1</sub> ) |

<sup>a</sup>The torsion angle  $\gamma$  (O5'-C5'-C4'-C3') defined the 5'-OH toward the sugar ring; <sup>b</sup>The torsion angle of  $\chi$ (O4'-C1'-N9-C4) range -90~+90° is denoted as *syn*, and range 180±90° is denoted as *anti*, most of these nucleoside conformers show *anti* conformation.

**Table S4.** The torsion angle of bonds in the sugar ring.

| Compounds                                | Conformers | $\nu_0$ (°)       | $\nu_1$ (°)       | $\nu_2$ (°)       | $\nu_3$ (°)       | $\nu_4$ (°)       |
|------------------------------------------|------------|-------------------|-------------------|-------------------|-------------------|-------------------|
|                                          |            | (C4'-O4'-C1'-C2') | (O4'-C1'-C2'-C3') | (C1'-C2'-C3'-C4') | (C2'-C3'-C4'-O4') | (C3'-C4'-O4'-C1') |
| <b>G<sub>d</sub></b>                     | I          | 1.2289            | 20.2429           | -32.8569          | 33.7548           | -21.874           |
|                                          | II         | -28.6577          | 40.7168           | -36.6938          | 20.6538           | 4.9408            |
|                                          | III        | -13.7009          | 26.4849           | -28.3379          | 20.8579           | -4.7519           |
|                                          | IV         | -1.4438           | 20.4018           | -30.3498          | 30.1058           | -18.3398          |
|                                          | V          | 8.8439            | -29.3108          | 37.7708           | -34.0498          | 16.3479           |
|                                          | VI         | -33.1969          | 42.1489           | -34.3559          | 15.8811           | 10.4959           |
|                                          | VII        | -24.5007          | 38.4827           | -36.4628          | 22.9468           | 1.0018            |
|                                          | VIII       | -10.3869          | 28.7839           | -35.1089          | 29.4139           | -11.9941          |
|                                          | IX         | -17.3988          | 35.5307           | -39.1497          | 29.5247           | -7.7508           |
|                                          | X          | -27.2671          | 34.9101           | -28.5261          | 13.7791           | 8.1011            |
|                                          | XI         | 20.2198           | -34.7338          | 34.6938           | -23.4018          | 2.2728            |
|                                          | XII        | -39.8978          | 43.3518           | -30.2019          | 7.5749            | 19.5048           |
| <b>G</b>                                 | I          | -38.5202          | 44.2422           | -32.4092          | 11.0762           | 16.9872           |
|                                          | II         | -22.0542          | 34.7422           | -33.3912          | 21.9542           | 0.1692            |
| <b><math>\alpha</math>G<sub>d</sub></b>  | I          | 13.1194           | 7.0404            | -22.9514          | 30.8264           | -27.8014          |
|                                          | II         | 11.7224           | 7.9474            | -23.1254          | 30.3224           | -26.6804          |
| <b><math>\alpha</math>G<sub>d</sub>*</b> | I          | -14.1506          | 25.4136           | -26.0826          | 18.3446           | -2.8446           |
|                                          | II         | -10.6307          | 6.9191            | -0.8072           | -5.3352           | 9.8201            |
|                                          |            | -31.3530          | 18.9832           | -0.5712           | -17.8861          | 31.9578           |

**Table S5** The bond length and bond angle of water moleculars in nucleoside crystals.

| Compounds                               | Number of H <sub>2</sub> O | Bond length (Å)  | Bond angle(°) |
|-----------------------------------------|----------------------------|------------------|---------------|
| <b>G<sub>d</sub></b>                    | H <sub>2</sub> O(1)        | -                | -             |
|                                         | H <sub>2</sub> O (2)       | -                | -             |
|                                         | H <sub>2</sub> O (3)       | 0.8695<br>0.8704 | 104.492       |
|                                         | H <sub>2</sub> O (4)       | 0.8707<br>0.8693 | 109.469       |
|                                         | H <sub>2</sub> O (5)       | 0.8697<br>0.8709 | 104.457       |
|                                         | H <sub>2</sub> O (6)       | 0.8712<br>0.8693 | 104.552       |
|                                         | H <sub>2</sub> O (7)       | 0.8702<br>0.8705 | 104.493       |
|                                         | H <sub>2</sub> O (8)       | 0.8699<br>0.8709 | 104.490       |
|                                         | H <sub>2</sub> O (9)       | 0.8701<br>0.8705 | 109.457       |
|                                         | H <sub>2</sub> O (10)      | 0.8703<br>0.8695 | 104.563       |
|                                         | H <sub>2</sub> O (11)      | 0.8705<br>0.8696 | 104.560       |
|                                         | H <sub>2</sub> O (12)      | 0.8709<br>0.8698 | 104.440       |
|                                         | H <sub>2</sub> O (13)      | 0.8706<br>0.8688 | 109.661       |
|                                         | H <sub>2</sub> O (14)      | 0.8705<br>0.8693 | 109.480       |
|                                         | H <sub>2</sub> O (15)      | 0.8712<br>0.8687 | 104.525       |
|                                         | H <sub>2</sub> O (16)      | 0.8692<br>0.8694 | 104.618       |
|                                         | H <sub>2</sub> O (17)      | -                | -             |
| <b>G</b>                                | H <sub>2</sub> O (1)       | 0.9063<br>0.8611 | 114.615       |
|                                         | H <sub>2</sub> O (2)       | 0.9169<br>0.7988 | 104.179       |
|                                         | H <sub>2</sub> O (3)       | 0.9177<br>0.9121 | 99.203        |
|                                         | H <sub>2</sub> O (4)       | 0.8729<br>0.8860 | 109.739       |
| <b><math>\alpha</math>G<sub>d</sub></b> | H <sub>2</sub> O (1)       | 0.7993<br>0.7993 | 79.338        |

## Reference

- S1. J. Liu, S. A. Ingale and F. Seela, Guanine and 8-azaguanine in anomeric DNA hybrid base pairs: stability, fluorescence sensing and efficient mismatch discrimination with  $\alpha$ -D-nucleosides, *Bioconjugate Chem.*, 2018, **29**, 2265-2277.
- S2. X.-Q. Xie, Y. Zhang, Y. Liang, M. Wang, Y. Cui, J. Li, and C.-S. Liu, Programmable transient supramolecular chiral G-quadruplex hydrogels by a chemically fueled non-equilibrium self-Assembly strategy, *Angew. Chem. Int. Ed. Engl.*, 2022, **61**, e202114471.
- S3. U. Thewalt, C. E. Bugg and R. E. Marsh, The crystal structure of guanosine dihydrate and inosine dihydrate, *Acta cryst.*, 1970, **B26**, 1089-1101.
